# Supplementary material for: Expedient alkyne semi-hydrogenation by using a bimetallic AgCu–C3N4 single atom catalyst
Source: Royal Society of Chemistry journal article supplement (doi:10.1039/d4sc02469a), 2024-01-01
Supplement: d4sc02469a1.pdf [file d4sc02469a1.pdf]

Supplementary Information

**Expedient Alkyne Semi-Hydrogenation by Using a Bimetallic AgCu-C<sub>3</sub>N<sub>4</sub> Single Atom Catalyst**

Jingting Song,<sup>‡</sup> Xiangbin Cai,<sup>‡</sup> Zhongxin Chen, Tie Wang, Shibo Xi, Hu Qikun, Ning Yan, and Kian Ping Loh\*

# These authors contributed equally to this work. Correspondence and requests for materials should be addressed to K. P. Loh ([chmlohkp@nus.edu.sg](mailto:chmlohkp@nus.edu.sg))

## Computational Section:

The calculations were carried out using density functional theory with the revised version of Perdew-Burke-Ernzerhof (revPBE), which can estimate the adsorption of species well.<sup>1-4</sup> The Vienna *ab-initio* simulation package (VASP)<sup>5-8</sup> was employed. The Brillouin zone was sampled only at the Gamma point. The plane wave energy cutoff was set as 400 eV. The Fermi scheme was employed for electron occupancy with an energy smearing of 0.1 eV. The energy (converged to  $1.0 \times 10^{-4}$  eV atom<sup>-1</sup>) and force (converged to 0.06 eV Å<sup>-1</sup>) were set as the convergence criterion for geometry optimization. The spin polarization was considered in all calculations. To accurately describe the van der Waals (vdW), the non-local van der Waals density functional (vdW-DF) was employed.<sup>9,10</sup> The projected Crystal Orbital Hamilton Population (pCOHP) method was used to visualize and analyze chemical bonding between catalysts and adsorbates with an MP-centered k-point of  $2 \times 2 \times 2$ , and the computer program Local Orbital Basis Suite Toward Electronic-Structure Reconstruction (LOBSTER) was used to process the pCOHP calculation results.<sup>11-12</sup>

## Models

A monolayer of  $2 \times 2$  supercell of tri-s-triazine-based *g*-C<sub>3</sub>N<sub>4</sub> with periodical boundary conditions was employed as the M-C<sub>3</sub>N<sub>4</sub> catalyst model. Meanwhile the differential charge of the AgCu-C<sub>3</sub>N<sub>4</sub> is investigated. The vacuum space was set to larger than 15 Å in the *z* direction to surface isolation to prevent interaction between two neighboring slabs. All the atoms were allowed to relax for structural optimization calculations.

## Gibbs free energies

The reaction activity in this work is estimated using the Gibbs Free Energy curves. For free energy change ( $\Delta G$ ) of elementary reaction can be defined as follows:

$$\Delta G = \Delta E_{DFT} + \Delta E_{ZPE} - T\Delta S$$

where  $\Delta E_{DFT}$  is the reaction energy of the elementary reaction by DFT, *i.e.* the energy difference between the final and initial states.  $\Delta E_{ZPE}$  and  $\Delta S$  are the differences in zero-point energy and entropy change between the final and initial states, respectively.

## References

- (1) B. Hammer, L. B. Hansen, J. K. Nørskov, *Phys. Rev. B* **1999**, 59, 7413-7421;
- (2) Y. K. Zhang, W. T. Yang, *Phys. Rev. B* **1998**, 80, 890;
- (3) W. A. Brown, R. Kose, D. A. King, *Chem. Rev.* **1998**, 98, 797-831;
- (4) K. Christmann, O. Schober, G. Ertl, *J. Chem Phys.* **1974**, 60, 4719-4724;
- (5) G. Kresse, J. Furthmüller, *Comp. Mater. Sci.* **1996**, 6, 15;
- (6) G. Kresse, J. Hafner, *Phys. Rev. B* **1993**, 47, 558;

- (7) G. Kresse, J. Hafner, *Phys. Rev. B* **1994**, 49, 14251;
- (8) G. Kresse, J. Furthmüller, *Phys. Rev. B* **1996**, 54, 11169;
- (9) M. Dion, R. Rydberg, E. Schröder, D. C. Langreth, B. I. Lundqvist, *Phys. Rev. Lett.* **2004**, 92, 246401;
- (10) J. Kliměš, D. R. Bowler, A. Michaelides, *J. Phys. Condens. Matter* **2010**, 22, 022201;
- (11) R. Dronskowski, P. E. Blochl, *J. Phys. Chem.* **1993**, 97, 8617;
- (12) V. L. Deringer, A. L. Tchougréeff, R. Dronskowski, *J. Phys. Chem. A* **2011**, 115, 5461.

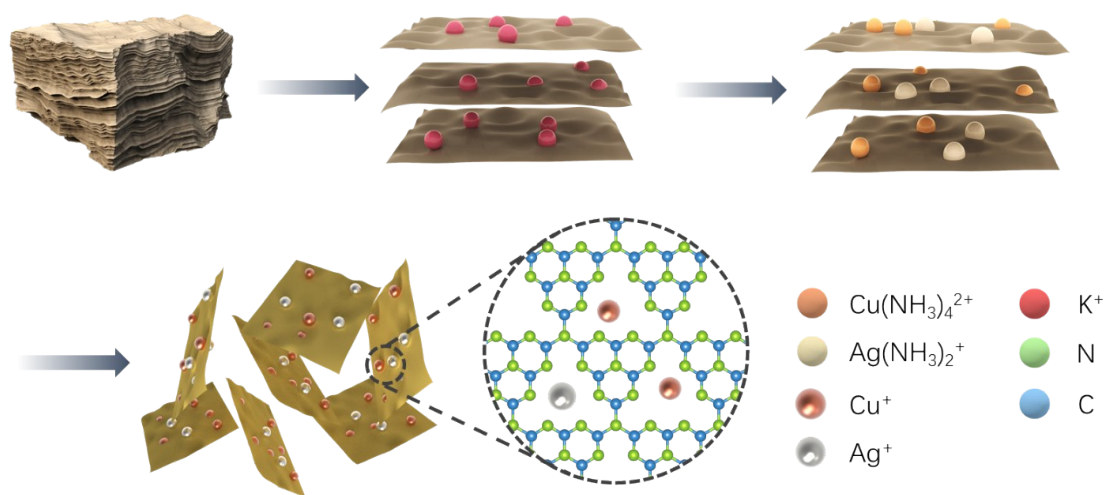

**Figure S1.** Schematic illustration of the preparation of AgCu-C<sub>3</sub>N<sub>4</sub> SACs.

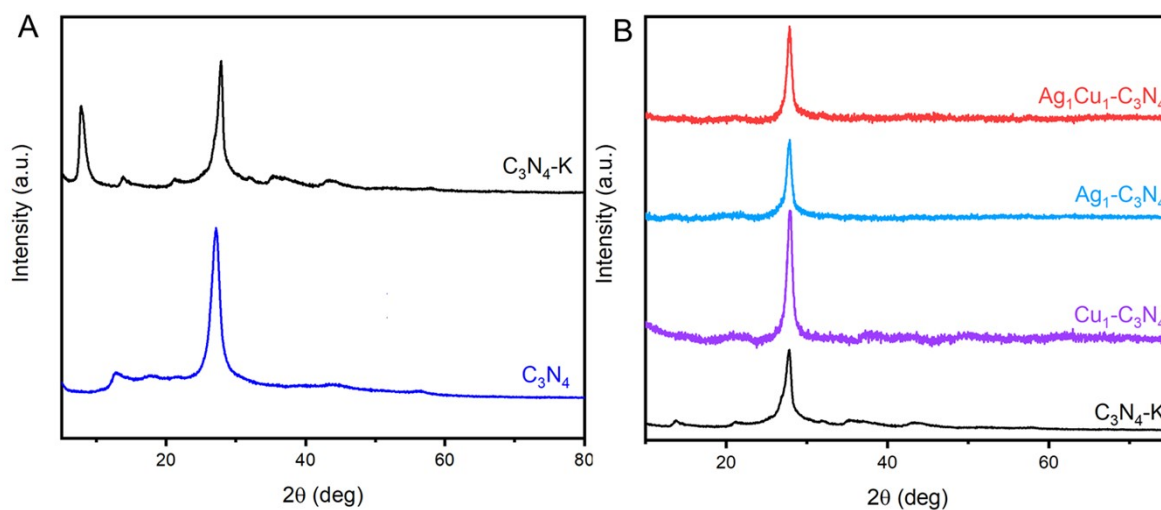

**Figure S2.** XRD patterns of (A) C<sub>3</sub>N<sub>4</sub>-K and *g*-C<sub>3</sub>N<sub>4</sub> showing successful intercalation of K ions, and (B) AgCu-C<sub>3</sub>N<sub>4</sub>, Ag-C<sub>3</sub>N<sub>4</sub>, and Cu-C<sub>3</sub>N<sub>4</sub> SACs compared with C<sub>3</sub>N<sub>4</sub>-K.

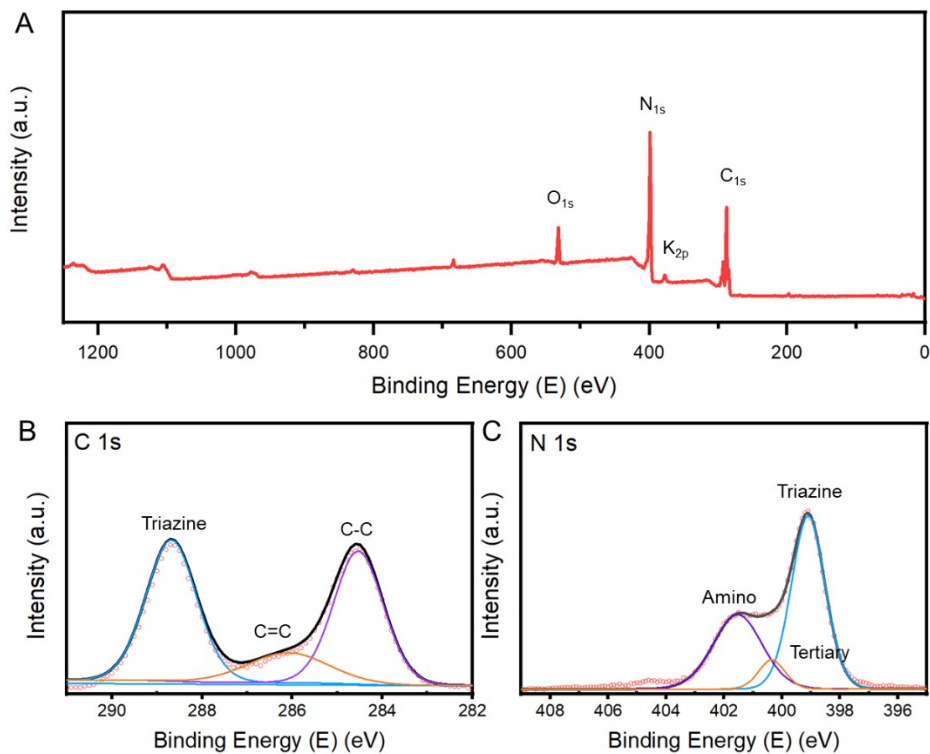

**Figure S3.** XPS spectra of  $C_3N_4-K$ : (A) survey; (B)  $C_{1s}$  and (C)  $N_{1s}$  spectra.

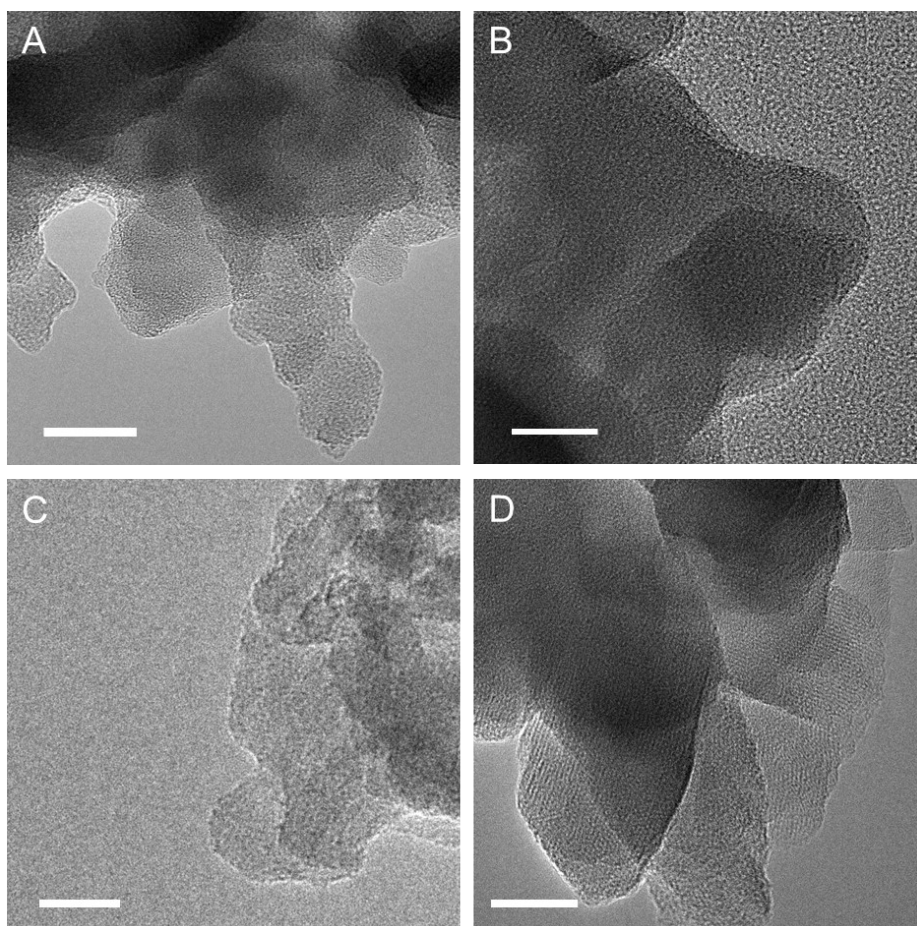

**Figure S4.** TEM images of as-prepared SACs and pristine support. (A)  $AgCu-C_3N_4$ , (B)  $Ag-C_3N_4$  (C)  $Cu-C_3N_4$  SACs, and (D)  $C_3N_4-K$ . Scale bar: (A-D) 20 nm.

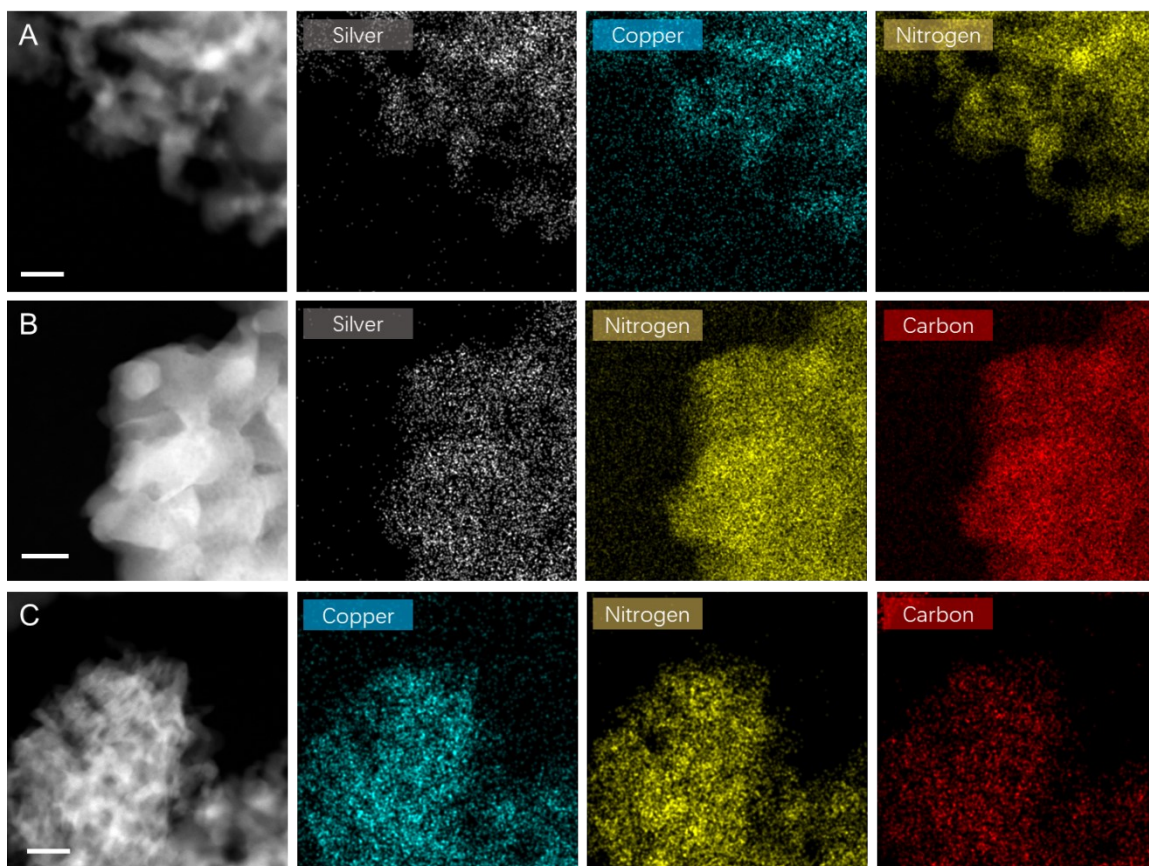

**Figure S5.** HAADF-STEM images and corresponding elemental mappings of (A) AgCu-C<sub>3</sub>N<sub>4</sub>, (B) Ag-C<sub>3</sub>N<sub>4</sub>, and (C) Cu-C<sub>3</sub>N<sub>4</sub> SACs. Elemental mappings: Ag (grey), Cu (cyan), N (yellow), and C (red). Scale bar: (A-C) 50 nm.

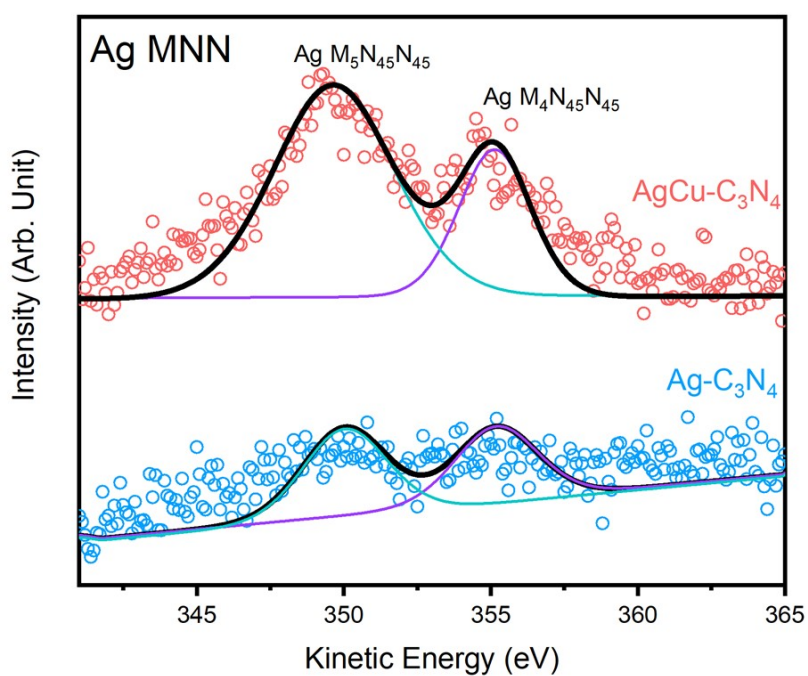

**Figure S6.** MNN Auger electron spectra of AgCu-C<sub>3</sub>N<sub>4</sub> and Ag-C<sub>3</sub>N<sub>4</sub>.

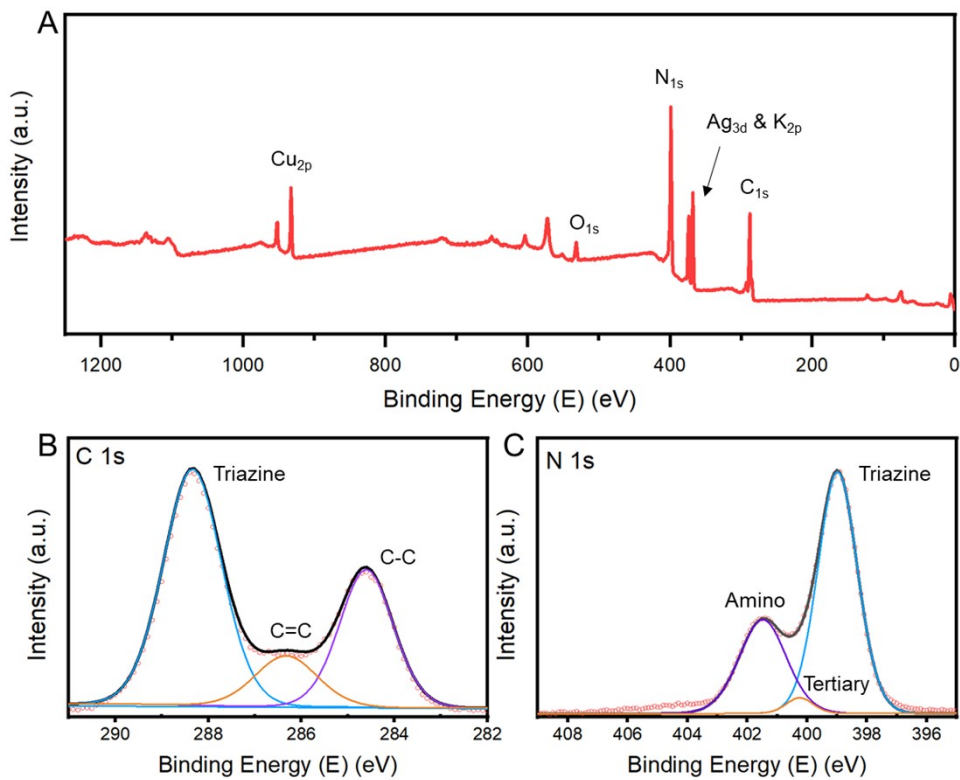

**Figure S7.** XPS spectra of AgCu-C<sub>3</sub>N<sub>4</sub> SAC: (A) survey; (B) C<sub>1s</sub> and (C) N<sub>1s</sub> spectra.

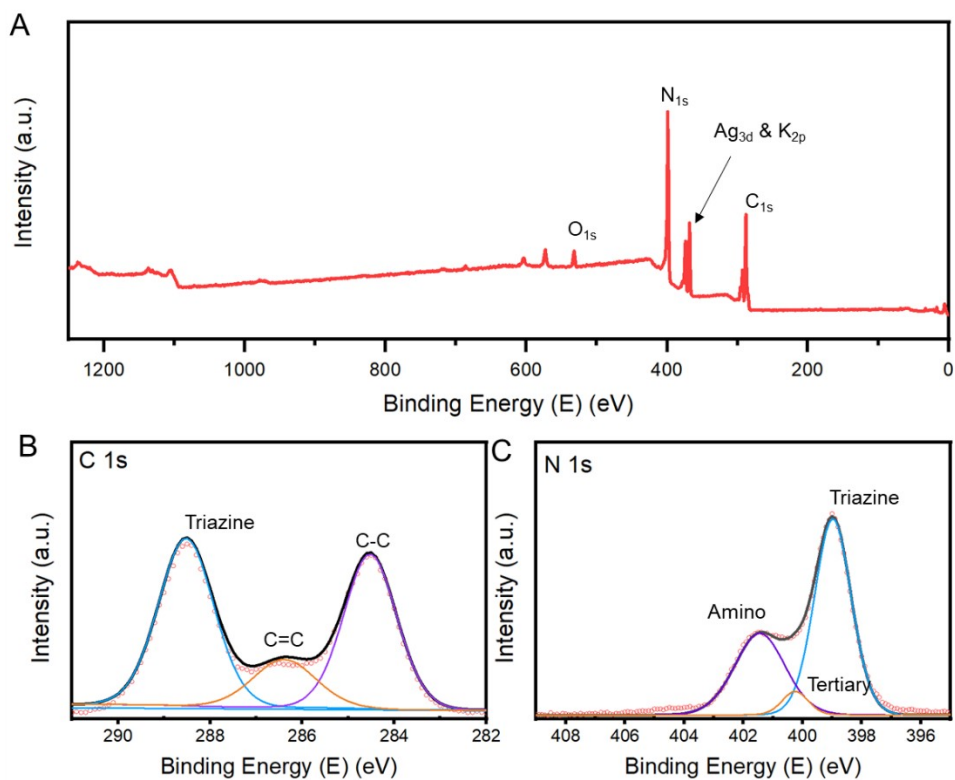

**Figure S8.** XPS spectra of Ag-C<sub>3</sub>N<sub>4</sub> SAC: (A) survey; (B) C<sub>1s</sub> and (C) N<sub>1s</sub> spectra.

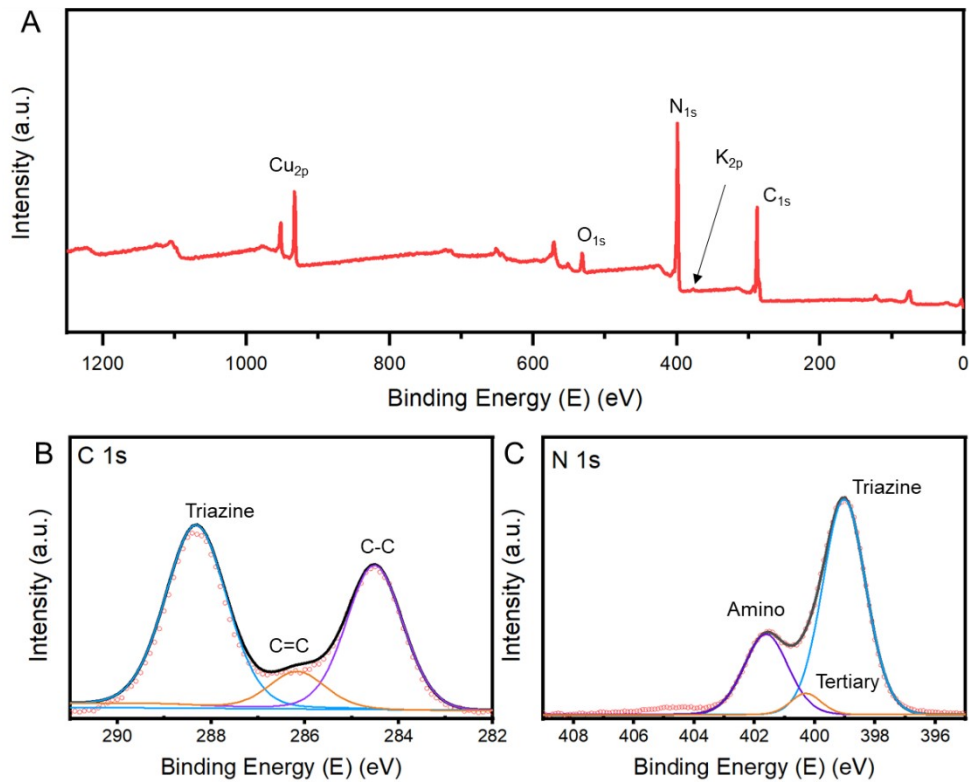

**Figure S9.** XPS spectra of Cu-C<sub>3</sub>N<sub>4</sub> SAC: (A) survey; (B) C<sub>1s</sub> and (C) N<sub>1s</sub> spectra. Note that the peak labeled with \* is associated with carbon paste during XPS sample preparation.

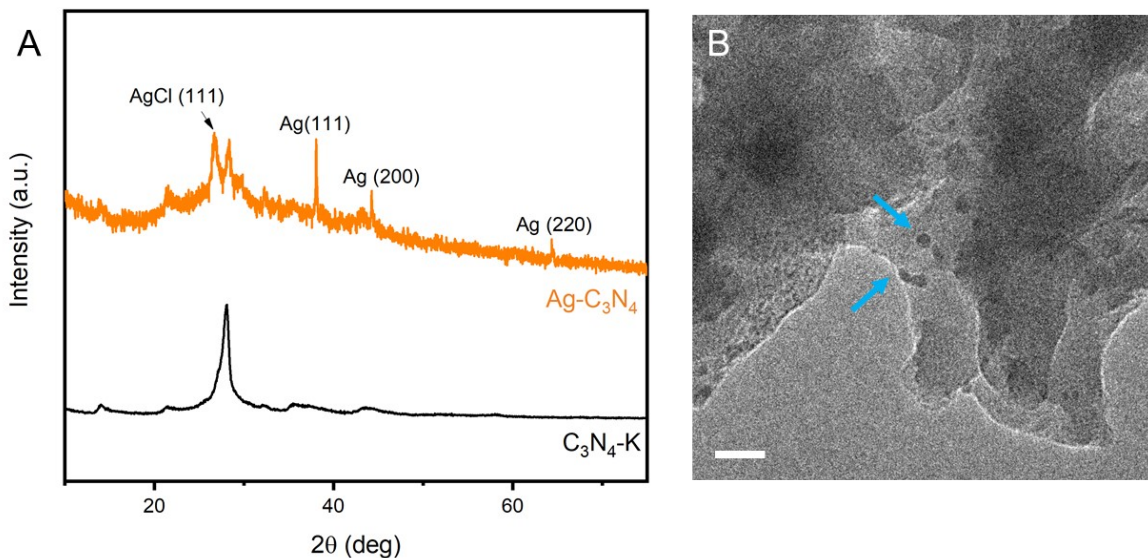

**Figure S10. Characterization of 23 wt% Ag-C<sub>3</sub>N<sub>4</sub>.** (A) XRD patterns of 23 wt% Ag-C<sub>3</sub>N<sub>4</sub> and C<sub>3</sub>N<sub>4</sub>-K. (B) TEM image of 23 wt% Ag-C<sub>3</sub>N<sub>4</sub>. Ag particles can be identified as black dots under TEM. Scale bar: (A) 20 nm.



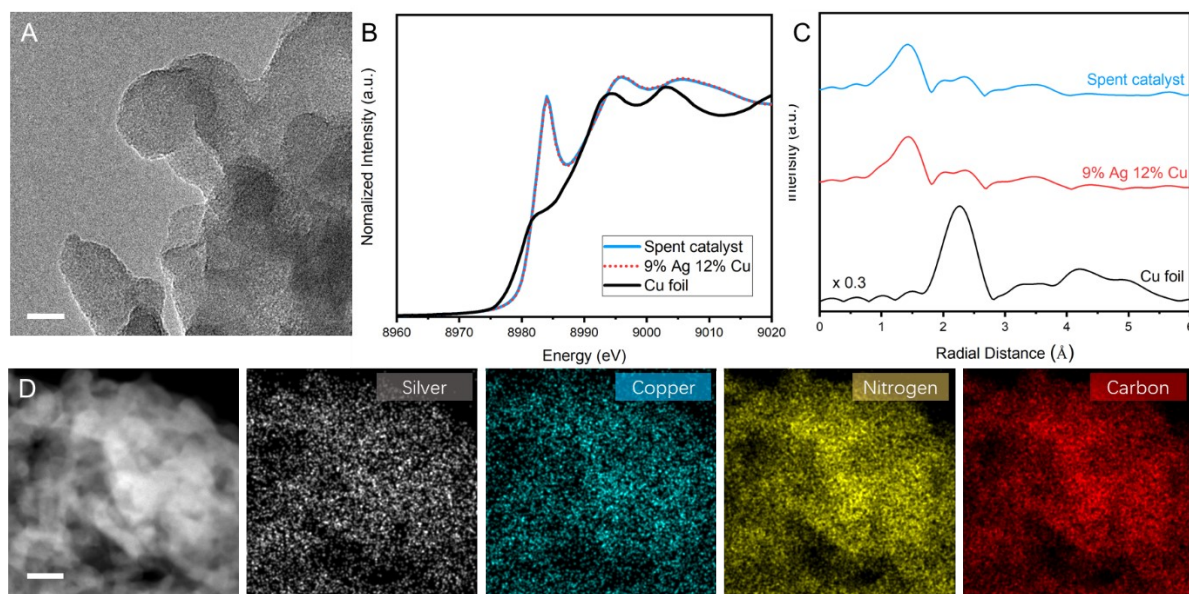

**Figure S11.** Characterization of spent AgCu-C<sub>3</sub>N<sub>4</sub> SAC. (A) TEM image, which shows no particle aggregation; (B) Cu *K*-edge XANES spectra; (C) Cu FT-EXAFS spectra; and (D) HAADF-STEM images and corresponding elemental mappings of the spent AgCu-C<sub>3</sub>N<sub>4</sub> SAC. Scale bar: (A) 20 nm; (D) 50 nm.

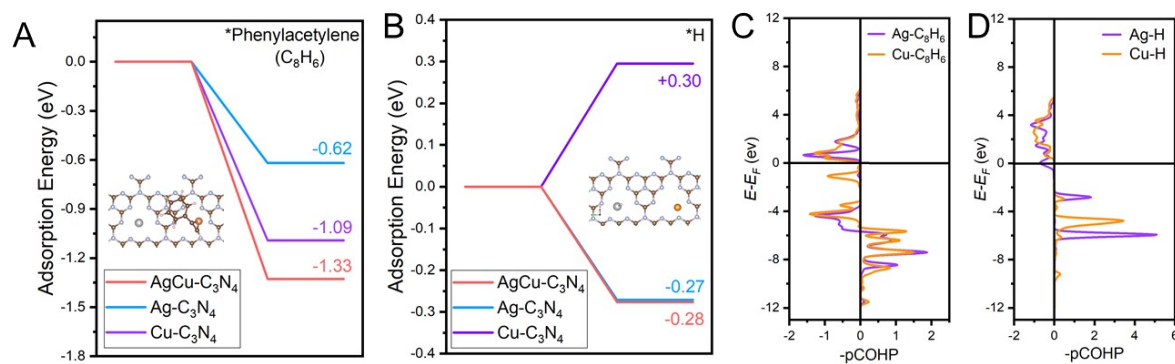

**Figure S12.** (A) Adsorption energy for phenylacetylene and (B) atomic H on AgCu-C<sub>3</sub>N<sub>4</sub>, Ag-C<sub>3</sub>N<sub>4</sub>, and Cu-C<sub>3</sub>N<sub>4</sub> SACs. (C) The p-COHP curves for phenylacetylene and (D) atomic H adsorption on Ag and Cu site of AgCu-C<sub>3</sub>N<sub>4</sub>.

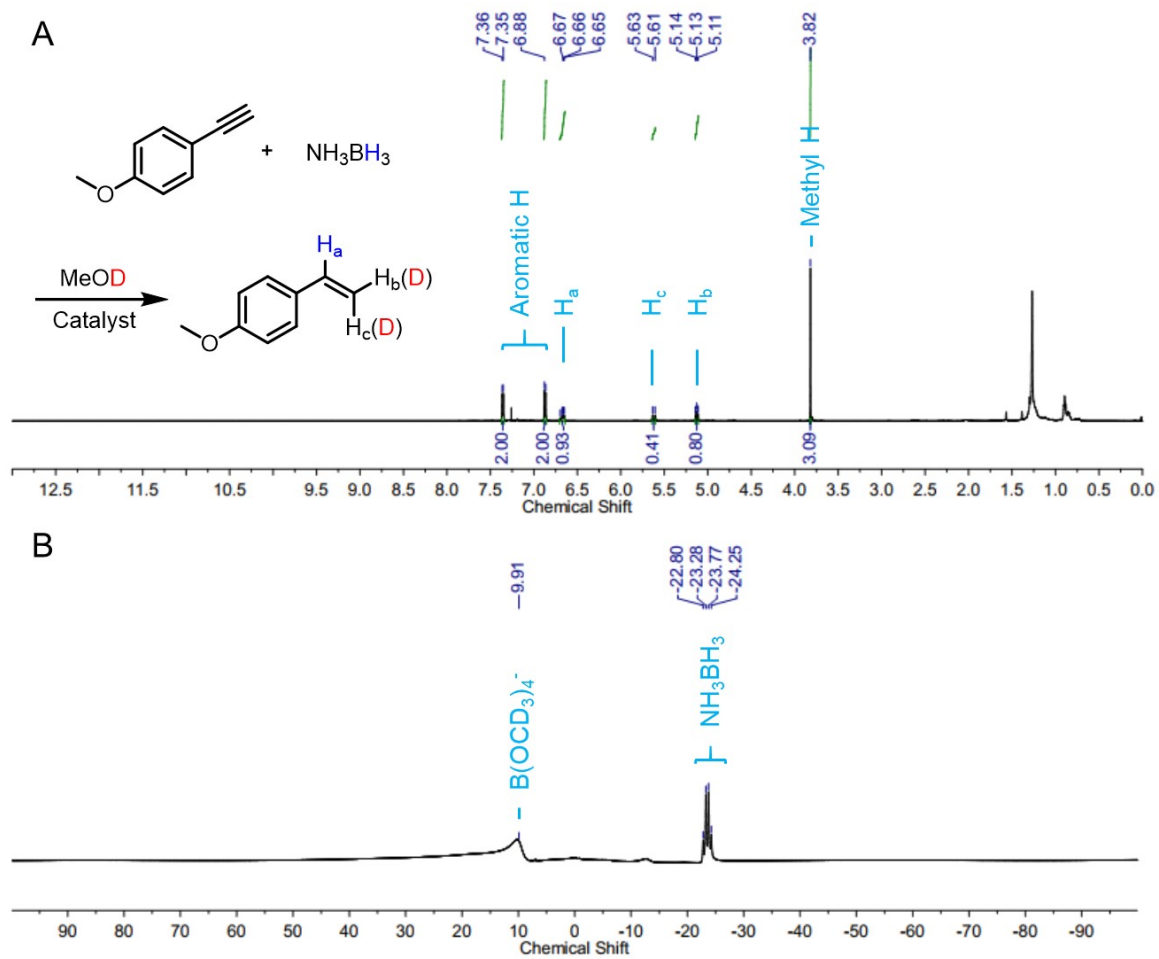

**Figure S13.** NMR spectrum for semi-hydrogenation product using MeOD as solvent. (A)  $^1\text{H}$  NMR spectrum of alkene product and (B)  $^{11}\text{B}$  NMR spectrum of reaction filtrate.

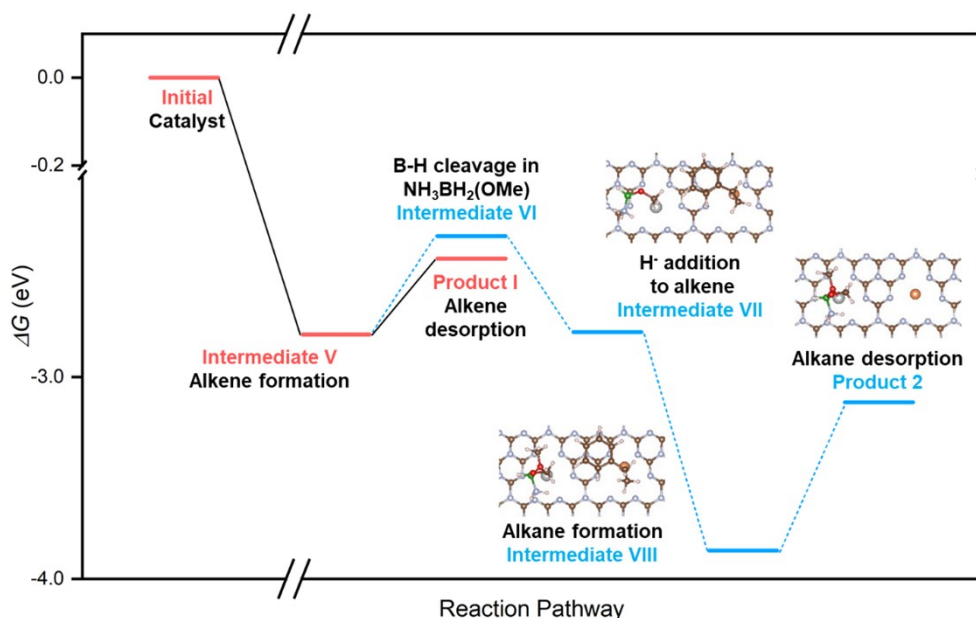

**Figure S14. DFT-calculated energy pathway for fully hydrogenation of 4-ethynylanisole by  $\text{NH}_3\text{BH}_3$ .** Steps of semi-hydrogenation to alkene has been omitted. Inset shows the optimized configuration of each intermediates adsorbed on  $\text{AgCu-C}_3\text{N}_4$  catalyst. The color scheme used: silver for Ag, orange for Cu, brown for C; grey for N, green for B, red for O, and pink for H.

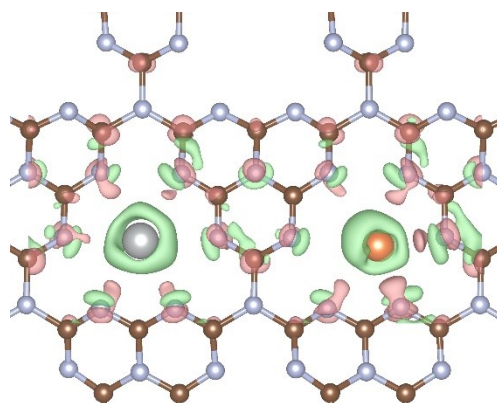

**Figure S15. The charge density difference of  $\text{AgCu-C}_3\text{N}_4$  model.** The color scheme used: silver for Ag, orange for Cu, brown for C and grey for N. Green and pink regions in differential charge density represent electron accumulation and depletion, respectively.

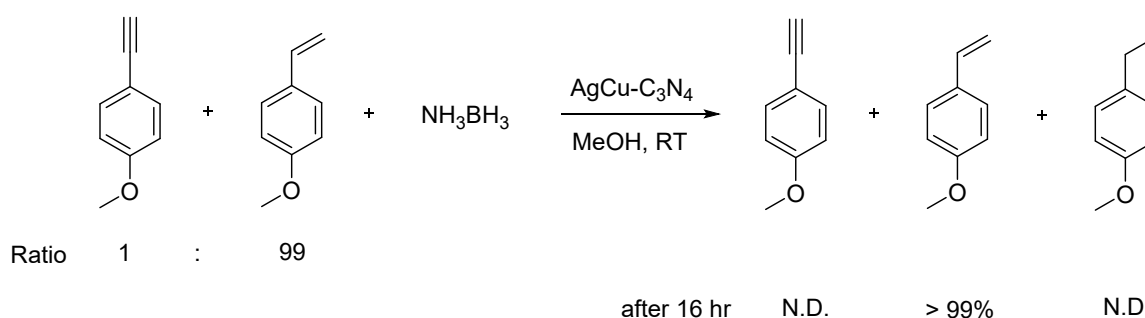

**Figure S16. Demonstration of selective hydrogenation of alkyne to remove the trace amount of alkyne from alkene.**

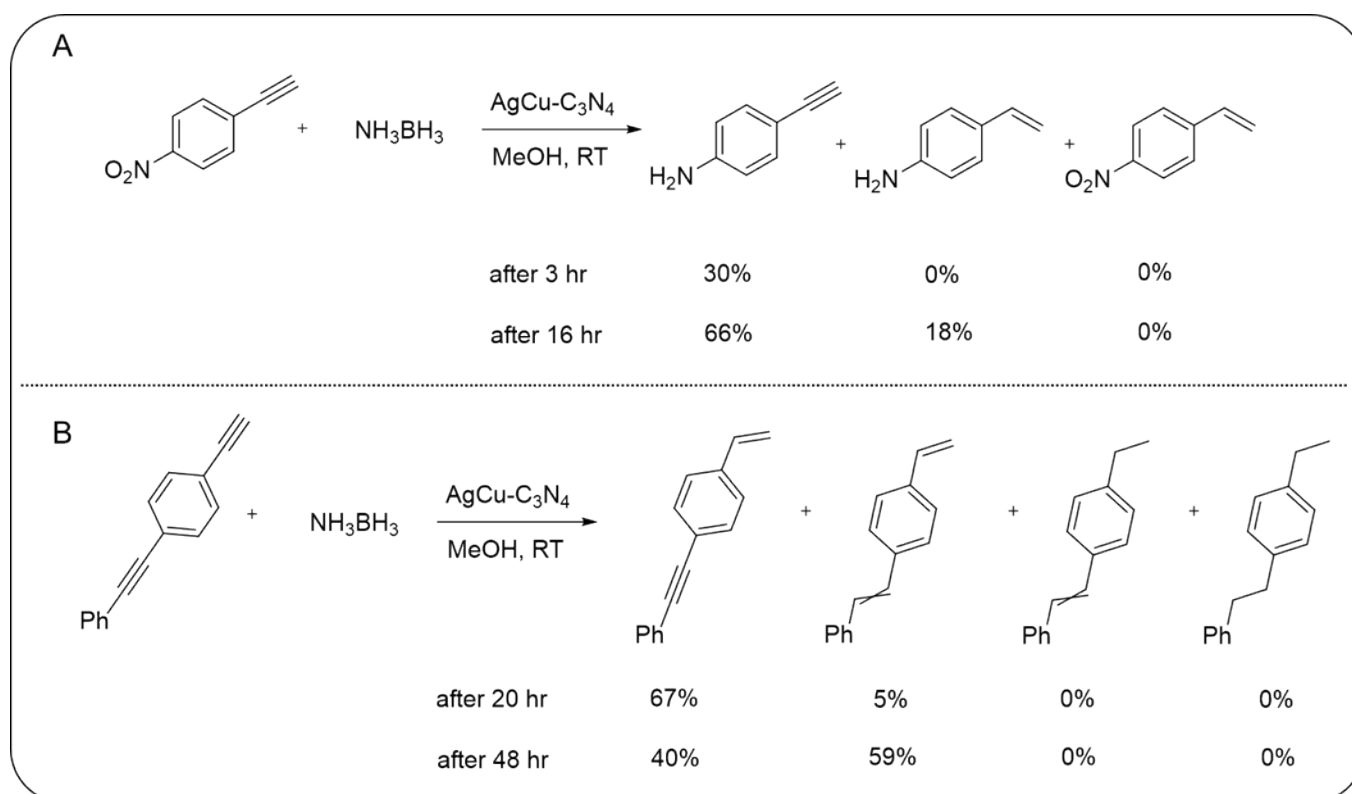

**Figure S17.** semi-hydrogenation of (A) *p*-nitrophenylacetylene and (B) 1-ethynyl-4-(phenylethynyl)benzene. For *p*-nitrophenylacetylene, Cu has a stronger affinity for the aryl nitro group than for the alkyne (*Nat Commun* **2022**, *13*, 2807), so reduction of the aryl nitro group occurs first, followed by the reduction of alkyne. In the case of 1-ethynyl-4-(phenylethynyl)benzene, the terminal alkyne is reduced first due to its less steric hindrance than the internal alkyne.

**Table S1.** Elementary composition of C<sub>3</sub>N<sub>4</sub>-based SACs.

| Sample                             | ICP-OES | ICP-OES |
|------------------------------------|---------|---------|
|                                    | Ag/wt%  | Cu/wt%  |
| AgCu-C <sub>3</sub> N <sub>4</sub> | 9.2     | 12.0    |
| Ag-C <sub>3</sub> N <sub>4</sub>   | 9.5     | 3.9     |
| Cu-C <sub>3</sub> N <sub>4</sub>   | 21.4    | 1.5     |

**Table S2.** The elementary composition of AgCu-C<sub>3</sub>N<sub>4</sub> SACs for metal loading dependent catalytic performance study in **Figure 3C**.

| Sample | ICP-OES | ICP-OES | <b>2a</b> yield |
|--------|---------|---------|-----------------|
|        | Ag/wt%  | Cu/wt%  |                 |
| 1      | 4.0     | 9.2     | 5%              |
| 2      | 3.0     | 11.9    | 27%             |
| 3      | 8.8     | 12.0    | 99%             |
| 4      | 15.7    | 8.5     | 99%             |
| 5      | 14.4    | 3.9     | 99%             |
| 6      | 14.6    | 1.5     | 99%             |
| 7      | 7.0     | 5.0     | 33%             |
| 8      | 6.7     | 2.5     | 25%             |
| 9      | 3.2     | 2       | 1%              |

**Table S3.** Results of the EXAFS fitting of various catalysts.

|                                    | Bonding | N         | R (Å) | $\sigma^2$ (Å <sup>2</sup> ) | $\Delta E_0$ (eV) | R-factor |
|------------------------------------|---------|-----------|-------|------------------------------|-------------------|----------|
| AgCu-C <sub>3</sub> N <sub>4</sub> | Cu-N    | 2.8 ± 0.5 | 1.89  | 0.006                        | 4.46              | 0.005    |
|                                    | Ag-N    | 2.5 ± 0.9 | 2.21  | 0.008                        | -0.153            | 0.01     |
| Ag-C <sub>3</sub> N <sub>4</sub>   | Ag-N    | 2.9 ± 0.5 | 2.21  | 0.007                        | 1.83              | 0.01     |
| Cu-C <sub>3</sub> N <sub>4</sub>   | Cu-N    | 3.4 ± 0.2 | 1.91  | 0.007                        | 3.78              | 0.002    |
| Spent catalyst                     | Cu-N    | 3.1 ± 0.5 | 1.89  | 0.005                        | 4.03              | 0.006    |
| Ag <sub>2</sub> O                  | Ag-O    | 2.0       | 2.05  | 0.003                        | 5.41              | 0.002    |
| Ag foil                            | Ag-Ag   | 12.0      | 2.86  | 0.011                        | 1.03              | 0.008    |
| Cu foil                            | Cu-Cu   | 12.0      | 2.54  | 0.008                        | 3.51              | 0.002    |

**Table S4.** Reaction condition screening for semi-hydrogenation of 4-ethynylanisole<sup>a</sup>

| Entry           | Reductant                       | Solvent          | Temperature | Reaction Time | Yield (%) |
|-----------------|---------------------------------|------------------|-------------|---------------|-----------|
| 1               | NH <sub>3</sub> BH <sub>3</sub> | MeOH             | R.T         | 20 hr         | 99        |
| 2               | NH <sub>3</sub> BH <sub>3</sub> | Ethyl acetate    | R.T         | 20 hr         | 0         |
| 3               | NH <sub>3</sub> BH <sub>3</sub> | Dichloromethane  | R.T         | 20 hr         | 0         |
| 4               | NH <sub>3</sub> BH <sub>3</sub> | Diethyl ether    | R.T         | 20 hr         | 0         |
| 5               | NH <sub>3</sub> BH <sub>3</sub> | THF (anhydrous)  | R.T         | 20 hr         | 0         |
| 6               | NH <sub>3</sub> BH <sub>3</sub> | THF/MeOH = 10:1  | R.T         | 20 hr         | 45        |
| 8               | NH <sub>3</sub> BH <sub>3</sub> | EtOH             | R.T         | 20 hr         | 28        |
| 9               | NH <sub>3</sub> BH <sub>3</sub> | iPr-OH           | R.T         | 20 hr         | 18        |
| 10              | NH <sub>3</sub> BH <sub>3</sub> | H <sub>2</sub> O | R.T         | 20 hr         | 77        |
| 11 <sup>b</sup> | H <sub>2</sub> (1 atm)          | MeOH             | R.T         | 20 hr         | 0         |
| 12              | NH <sub>3</sub> BH <sub>3</sub> | MeOH             | 45 °C       | 10 hr         | 99        |
| 13              | NH <sub>3</sub> BH <sub>3</sub> | MeOH             | 60 °C       | 2 hr          | 99        |

<sup>a</sup> Condition: 0.1 mmol of 4-ethynylanisole (13  $\mu$ L), 0.5 mmol of NH<sub>3</sub>BH<sub>3</sub> (15.0 mg), 1 mL of solvent, AgCu-C<sub>3</sub>N<sub>4</sub> SAC (3mg), room temperature, 24 h, under ambient condition. The yield of 4-vinylnisole was determined by GC-MS; <sup>b</sup> H<sub>2</sub> balloon was used without adding NH<sub>3</sub>BH<sub>3</sub>.

**Table S5.** Performance tracker for SAC catalysed semi-hydrogenation of alkynes.

| Catalyst                                                        | Solvent            | Reducing agent                  | Temperature | Alkene selectivity | Reference                                             |
|-----------------------------------------------------------------|--------------------|---------------------------------|-------------|--------------------|-------------------------------------------------------|
| AgCu-C <sub>3</sub> N <sub>4</sub>                              | MeOH               | NH <sub>3</sub> BH <sub>3</sub> | RT to 60 °C | > 99%              | This work                                             |
| Pd <sub>1</sub> /BP                                             | MeOH               | NH <sub>3</sub> BH <sub>3</sub> | 80 °C       | > 90%              | <i>Adv. Mater.</i> <b>2021</b> , 33, 2008471          |
| Cu <sub>1</sub> /CN/Al <sub>2</sub> O <sub>3</sub>              | MeOH               | NH <sub>3</sub> BH <sub>3</sub> | 70 °C       | 98%                | <i>Chem. Sci.</i> <b>2021</b> , 12, 14599             |
| PdNP@Ni <sub>1</sub> - $\gamma$ -Al <sub>2</sub> O <sub>3</sub> | EtOH               | H <sub>2</sub> (1atm)           | RT          | > 99%              | <i>ACS Catal.</i> <b>2022</b> , 12, 24, 14846         |
| Pd <sub>1</sub> /ZIF-8                                          | Ethyl Acetate      | H <sub>2</sub> (1atm)           | 120 °C      | 100%               | <i>Nano Res.</i> <b>2023</b> , 16, 8003               |
| Pd <sub>1</sub> /Ni@G                                           | EtOH               | H <sub>2</sub> (2 bar)          | 30 °C       | 93%                | <i>Adv. Mater.</i> <b>2022</b> , 34, 2110455          |
| Pt <sub>1</sub> -Sn <sub>1</sub> /N-C                           | MeOH               | H <sub>2</sub> (10 atm)         | 50 °C       | > 97%              | <i>Nat Commun</i> <b>2019</b> , 10, 3663              |
| Pd <sub>1</sub> @Cu-SiW                                         | Gas-phase reaction | H <sub>2</sub>                  | 120 °C      | 93%                | <i>Angew. Chem. Int. Ed.</i> <b>2021</b> , 60, 22522  |
| Pd <sub>1</sub> /N-graphene                                     | Gas-phase reaction | H <sub>2</sub>                  | 125 °C      | 93.5%              | <i>Adv. Mater.</i> <b>2019</b> , 31, 1900509          |
| Pd <sub>1</sub> Cu <sub>1</sub> /ND@G                           | Gas-phase reaction | H <sub>2</sub>                  | 110 °C      | 92%                | <i>J. Am. Chem. Soc.</i> <b>2022</b> , 144, 40, 18485 |
| Pd <sub>1</sub> /CeO <sub>2</sub>                               | Gas-phase reaction | H <sub>2</sub>                  | 160 °C      | 85%                | <i>Nano Res.</i> <b>2022</b> , 15, 10037              |

## <sup>1</sup>H NMR of organic compounds.

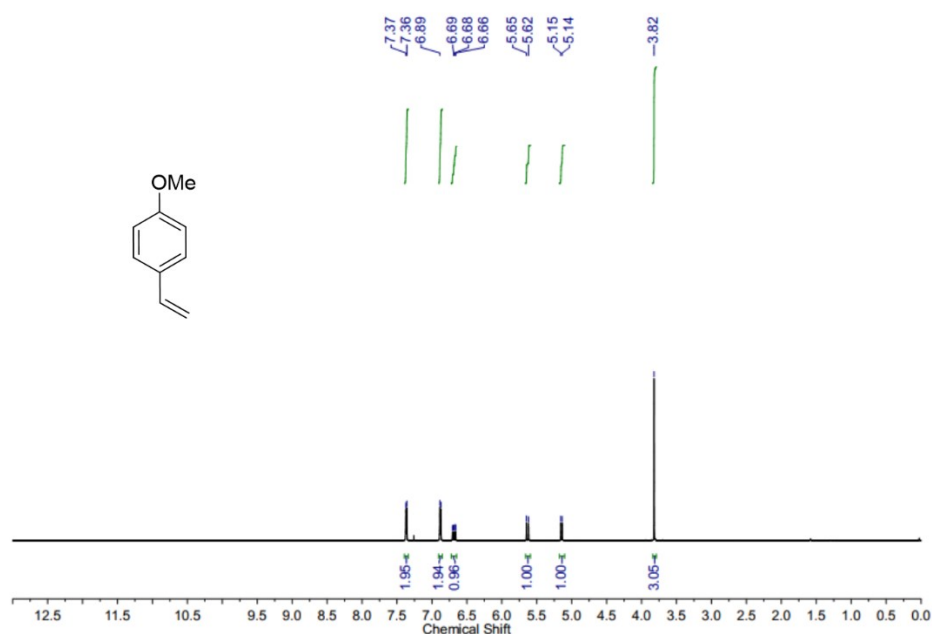

**1-methoxy-4-vinylbenzene (2a).** <sup>1</sup>H NMR (600 MHz, CDCl<sub>3</sub>) δ = 7.37-7.36 (d, 2H), 6.89 (s, 2H), 6.69-6.66 (m, 1H), 5.65-5.62 (d, 1H), 5.15-5.14 (d, 1H), 3.82 (s, 3H).

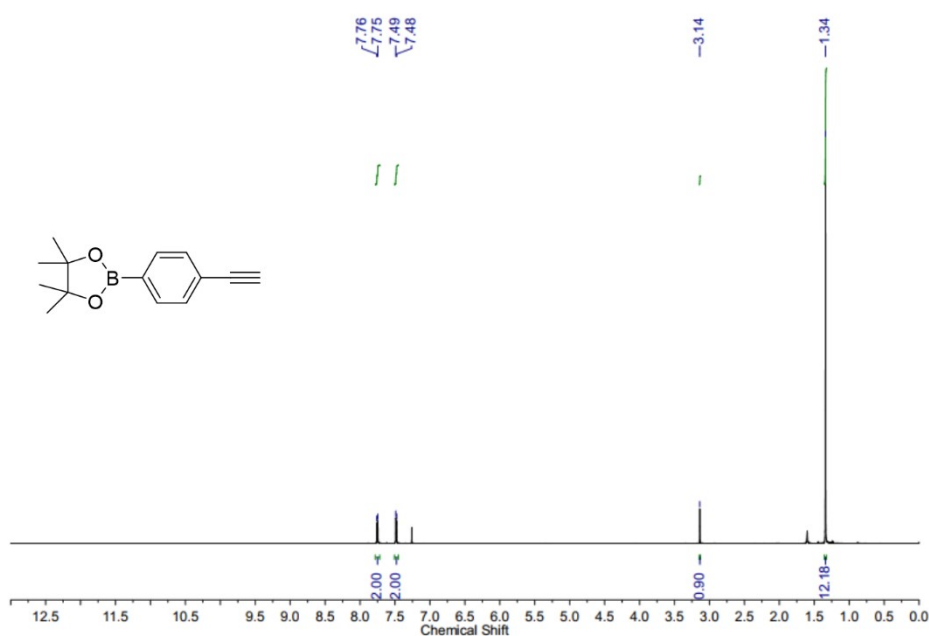

**2-(4-ethynylphenyl)-4,4,5,5-tetramethyl-1,3,2-dioxaborolane (1b).** <sup>1</sup>H NMR (600 MHz, CDCl<sub>3</sub>) δ = 7.76-7.75 (d, 2H), 7.49-7.48 (d, 2H), 3.14 (s, 1H), 1.34 (s, 12H).



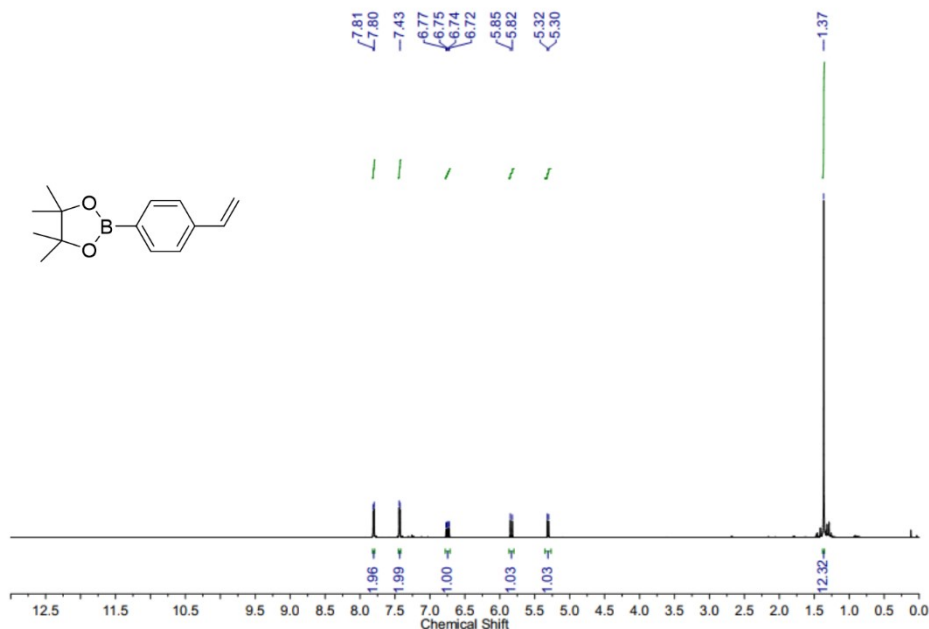

**4,4,5,5-tetramethyl-2-(4-vinylphenyl)-1,3,2-dioxaborolane (2b).**  $^1\text{H NMR}$  (600 MHz,  $\text{CDCl}_3$ )  $\delta$  = 7.81-7.80 (d, 2H), 7.44-7.43 (d, 2H), 6.77-6.72 (m, 1H), 5.85-5.82 (d, 1H), 5.32-5.30 (d, 1H), 1.37 (s, 12H).

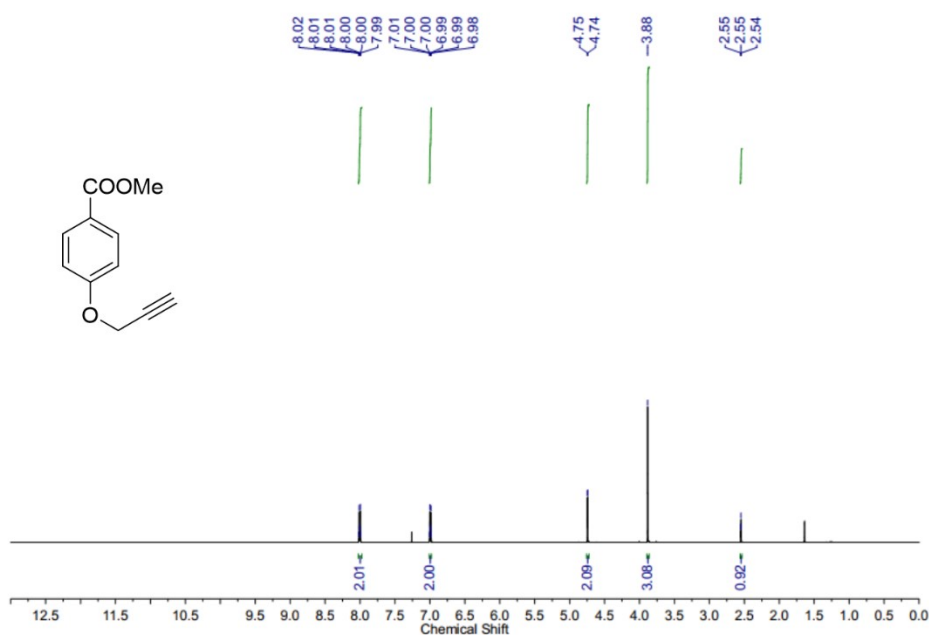

**Methyl 4-(ethynyloxy)benzoate (1c).**  $^1\text{H NMR}$  (600 MHz,  $\text{CDCl}_3$ )  $\delta$  = 8.02-7.99 (m, 2H), 7.01-6.98 (m, 2H), 4.75-4.74 (d, 2H), 3.88 (s, 3H), 2.55-2.54 (t, 1H).

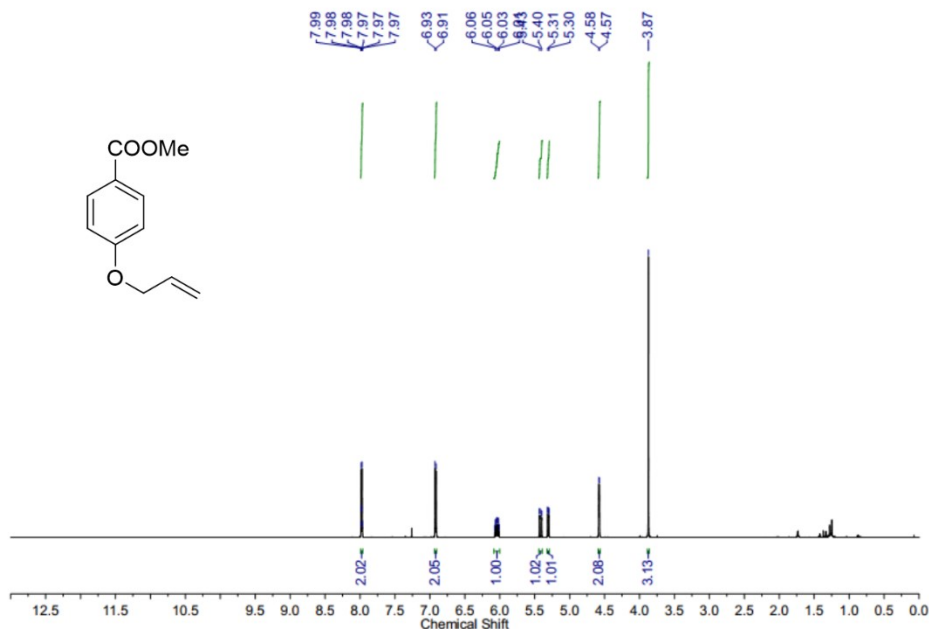

**Methyl 4-(vinylloxy)benzoate (2c).**  $^1\text{H NMR}$  (600 MHz,  $\text{CDCl}_3$ )  $\delta$  = 7.99-7.97 (m, 2H), 6.93-6.91 (d, 2H), 6.07-6.01 (m, 1H), 5.43-5.40 (m, 1H), 5.32-5.30 (m, 1H), 4.58-4.57 (d, 2H), 3.87 (s, 3H).

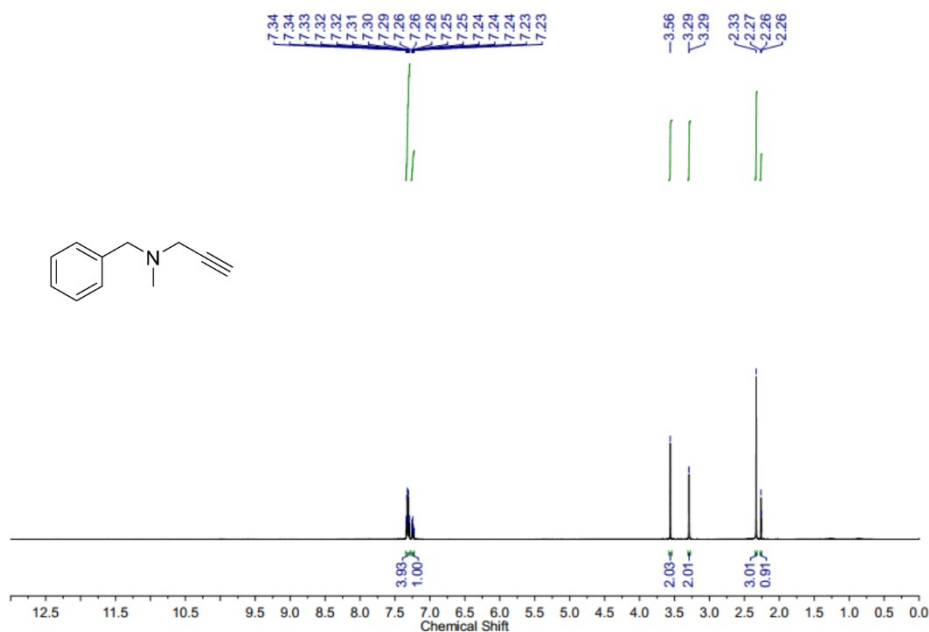

**N-benzyl-N-methylprop-2-yn-1-amine (1d).**  $^1\text{H NMR}$  (600 MHz,  $\text{CDCl}_3$ )  $\delta$  = 7.34-7.29 (m, 4H), 7.26-7.23 (m, 1H), 3.56 (s, 2H), 3.29 (d, 2H), 2.33 (s, 3H), 2.27-2.26 (t, 1H).

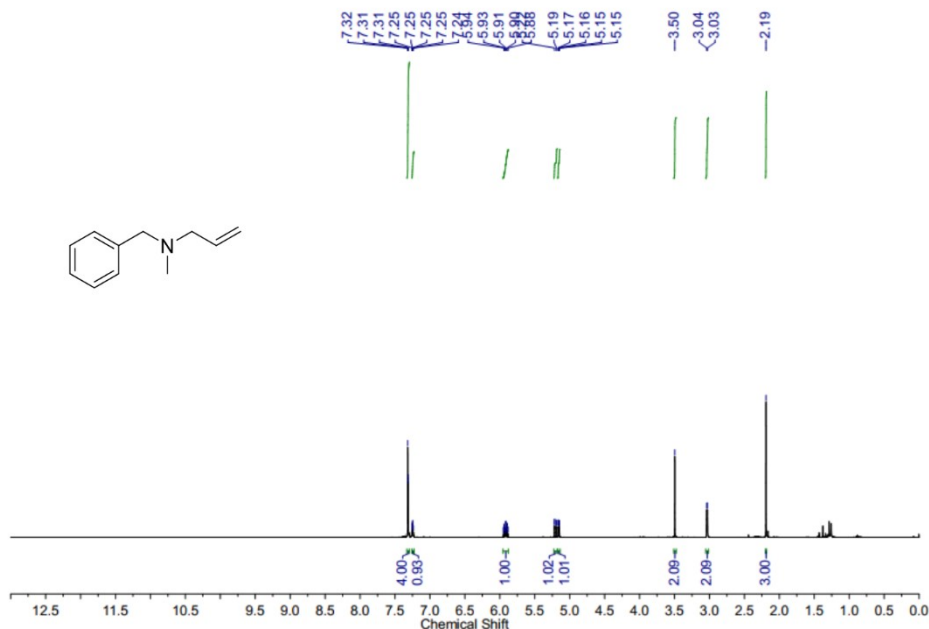

**N-benzyl-N-methylprop-2-en-1-amine (2d).**  $^1\text{H}$  NMR (600 MHz,  $\text{CDCl}_3$ )  $\delta = 7.32-7.31$  (m, 4H), 7.25-7.24 (m, 1H), 5.95-5.88 (m, 1H), 5.22-5.19 (m, 1H), 5.17-5.15 (m, 1H), 3.50 (s, 2H), 3.04-3.03 (d, 2H), 2.19 (s, 3H).

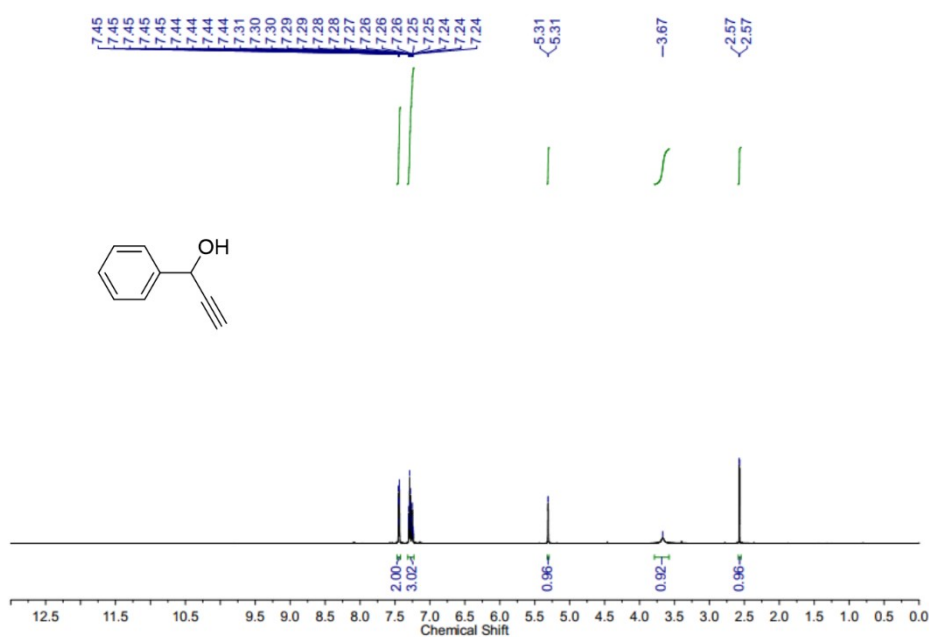

**1-phenylprop-2-yn-1-ol (1e).**  $^1\text{H}$  NMR (600 MHz,  $\text{CDCl}_3$ )  $\delta = 7.45-7.44$  (m, 2H), 7.31-7.24 (m, 3H), 5.31 (d, 1H), 3.67 (s, 1H), 2.57 (d, 1H).

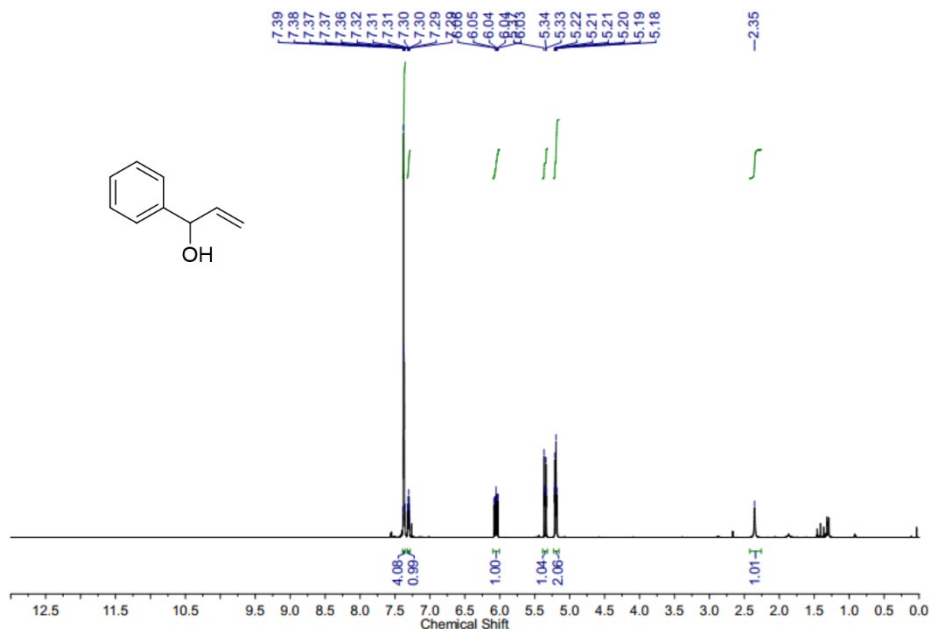

**1-phenylprop-2-en-1-ol (2e).**  $^1\text{H NMR}$  (600 MHz,  $\text{CDCl}_3$ )  $\delta = 7.39-7.36$  (m, 4H),  $7.32-7.29$  (m, 1H),  $6.08-6.03$  (m, 1H),  $5.37-5.33$  (m, 1H),  $5.22-5.18$  (m, 1H),  $2.35$  (s, 1H).

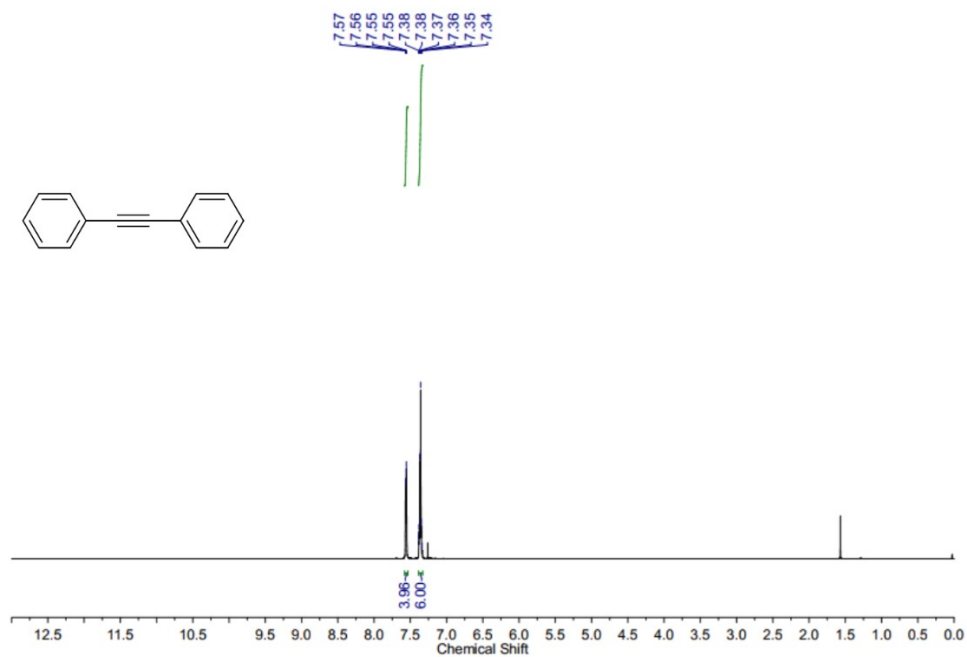

**1,2-diphenylethyne (1f).**  $^1\text{H NMR}$  (600 MHz,  $\text{CDCl}_3$ )  $\delta = 7.57-7.38$  (m, 4H),  $7.38-7.34$  (m, 6H).

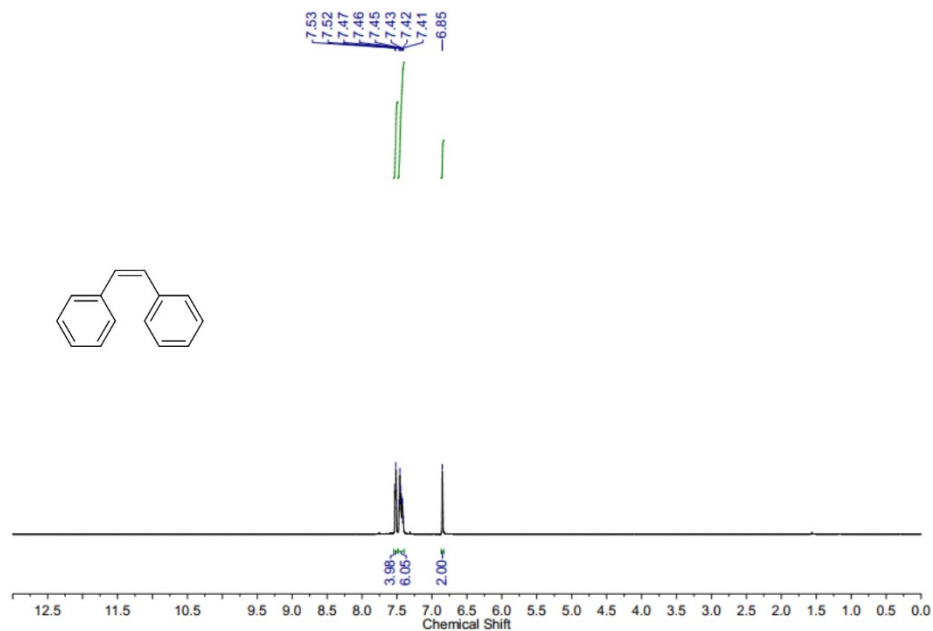

**(Z)-1,2-diphenylethene (2f-cis).** <sup>1</sup>H NMR (600 MHz, CDCl<sub>3</sub>) δ = 7.53-7.52 (d, 4H), 7.47-7.41 (m, 6H), 6.85 (s, 2H).

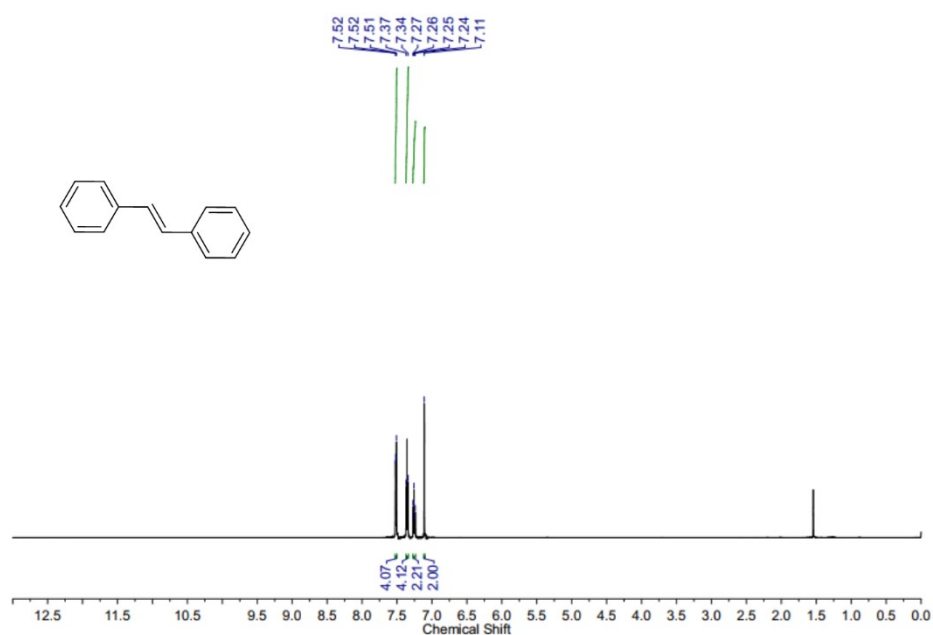

**(E)-1,2-diphenylethene (2f-trans).** <sup>1</sup>H NMR (600 MHz, CDCl<sub>3</sub>) δ = 7.52-7.51 (m, 4H), 7.37-7.34 (m, 4H), 7.27-7.24 (m, 2H), 7.11 (s, 2H).

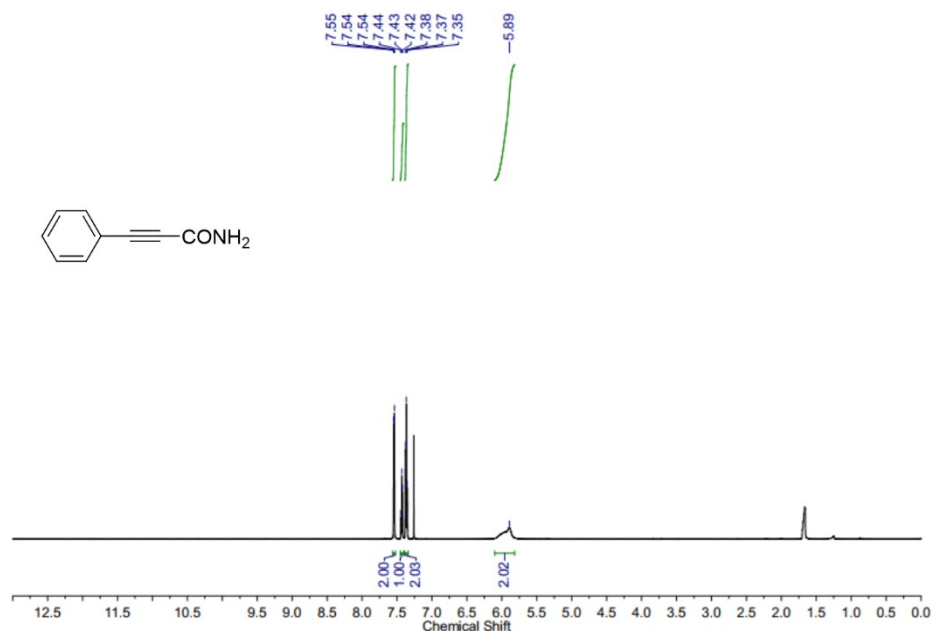

**3-phenylpropiolamide (1g).** <sup>1</sup>H NMR (600 MHz, CDCl<sub>3</sub>) δ = 7.55-7.54 (m, 2H) 7.44-7.42 (t, 1H), 7.38-7.35 (t, 2H), 5.89 (s, 2H).

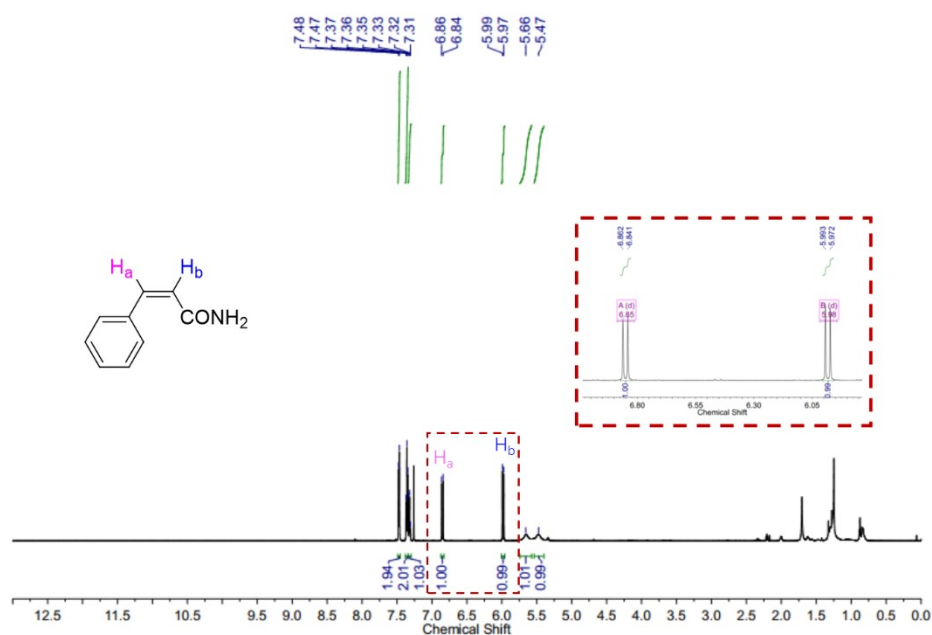

**(Z)-3-phenylacrylamide (2g-cis).** <sup>1</sup>H NMR (600 MHz, CDCl<sub>3</sub>) δ = 7.48-7.47 (d, 2H), 7.37-7.35 (m, 2H), 7.33-7.31 (m, 1H), 6.86-6.84 (d, 1H, *J* = 12.6 Hz), 5.99-5.97 (d, 1H, *J* = 12.6 Hz), 5.66 (s, 1H), 5.47 (s, 1H).

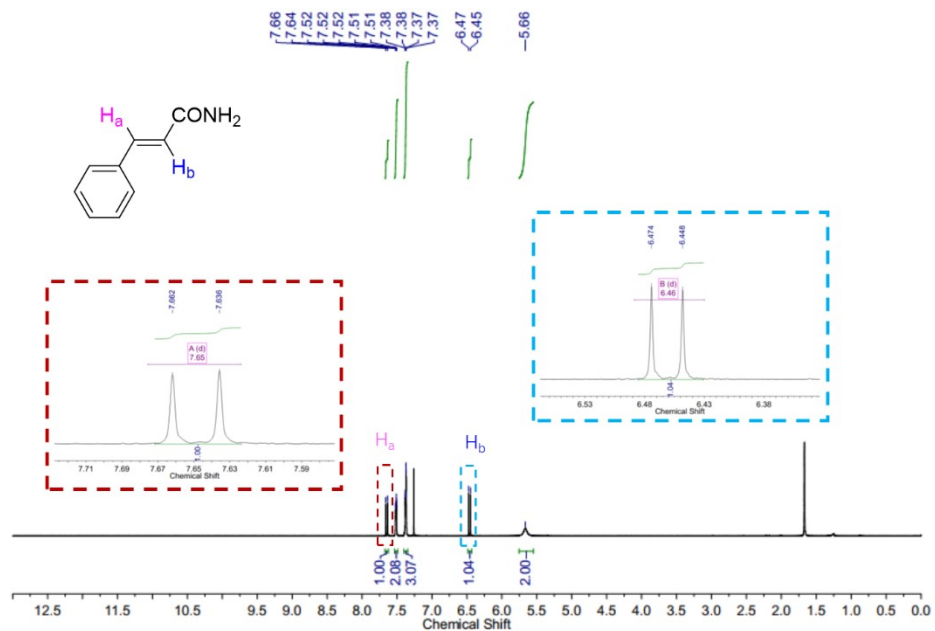

**(*E*)-3-phenylacrylamide (*2g-trans*).**  $^1H$  NMR (600 MHz,  $CDCl_3$ )  $\delta = 7.66-7.64$  (d, 1H,  $J = 15.6$  Hz), 7.52-7.51 (m, 2H), 7.38-7.37 (m, 3H), 6.47-6.45 (d, 1H,  $J = 15.6$  Hz), 5.66 (s, 2H).
